# Supplementary material for: Solubility enhancement of mefenamic acid by inclusion complex with β-cyclodextrin: in silico modelling, formulation, characterisation, and in vitro studies
Source: PubMed Central journal article supplement (PMC8759728; doi:10.1080/14756366.2020.1869225), 2021-02-08
Supplement: IENZ_A_1869225_SM2781.pdf [file IENZ_A_1869225_SM2781.pdf]

## SUPPORTING INFORMATION

### **Solubility Enhancement of Mefenamic Acid by Inclusion Complex with $\beta$ -Cyclodextrin: In Silico Modelling, Formulation, Characterization and In Vitro Studies**

Dounia Sid<sup>a</sup> , Milad Baitiche<sup>a,\*</sup> , Zineb Elbahri<sup>b</sup>, Ferhat Djerboua<sup>a</sup>, Mokhtar Boutahala<sup>c</sup> , Zouhair Bouaziz<sup>d</sup>  and Marc Le Borgne<sup>d,e\*</sup> 

<sup>a</sup>Laboratoire de Préparation, Modification et Applications des Matériaux Polymériques Multiphasiques, Département de Génie des Procédés, Faculté de Technologie, Université Ferhat Abbas Sétif-1, Boulevard du Sipion, Sétif 19000, Algérie; <sup>b</sup>Laboratory of Materials and Catalysis, Faculty of Exact Sciences, Djillali Liabès University of Sidi Bel Abbès, 22000 Algeria; <sup>c</sup>Laboratoire de Génie des Procédés Chimiques, Département de Génie des Procédés, Faculté de Technologie, Université Ferhat Abbas Sétif-1, Boulevard du Sipion, Sétif 19000, Algérie; <sup>d</sup>EA 4446 Bioactive Molecules and Medicinal Chemistry, SFR Santé Lyon-Est CNRS UMS3453 - INSERM US7, Université Claude Bernard Lyon 1, Univ Lyon, Lyon, 69373, France; <sup>e</sup>Small Molecules for Biological Targets Team, Centre de recherche en cancérologie de Lyon, Centre Léon Bérard, CNRS 5286, INSERM 1052, Université Claude Bernard Lyon 1, Univ Lyon, Lyon, 69373, France

\* Addresses for correspondence: Milad Baitiche, [baitiche\\_milad@yahoo.fr](mailto:baitiche_milad@yahoo.fr), Laboratoire de Préparation, Modification et Applications des Matériaux Polymériques Multiphasiques, Département de Génie des Procédés, Faculté de Technologie, Université Ferhat Abbas Sétif-1, Boulevard du Sipion, Sétif 19000, Algérie; Marc Le Borgne, [marc.le-borgne@univ-lyon1.fr](mailto:marc.le-borgne@univ-lyon1.fr), Faculté de Pharmacie - ISPB, EA 4446 Bioactive Molecules and Medicinal Chemistry, Université Claude Bernard Lyon 1, 8 avenue Rockefeller, Lyon cedex 8, 69373, France

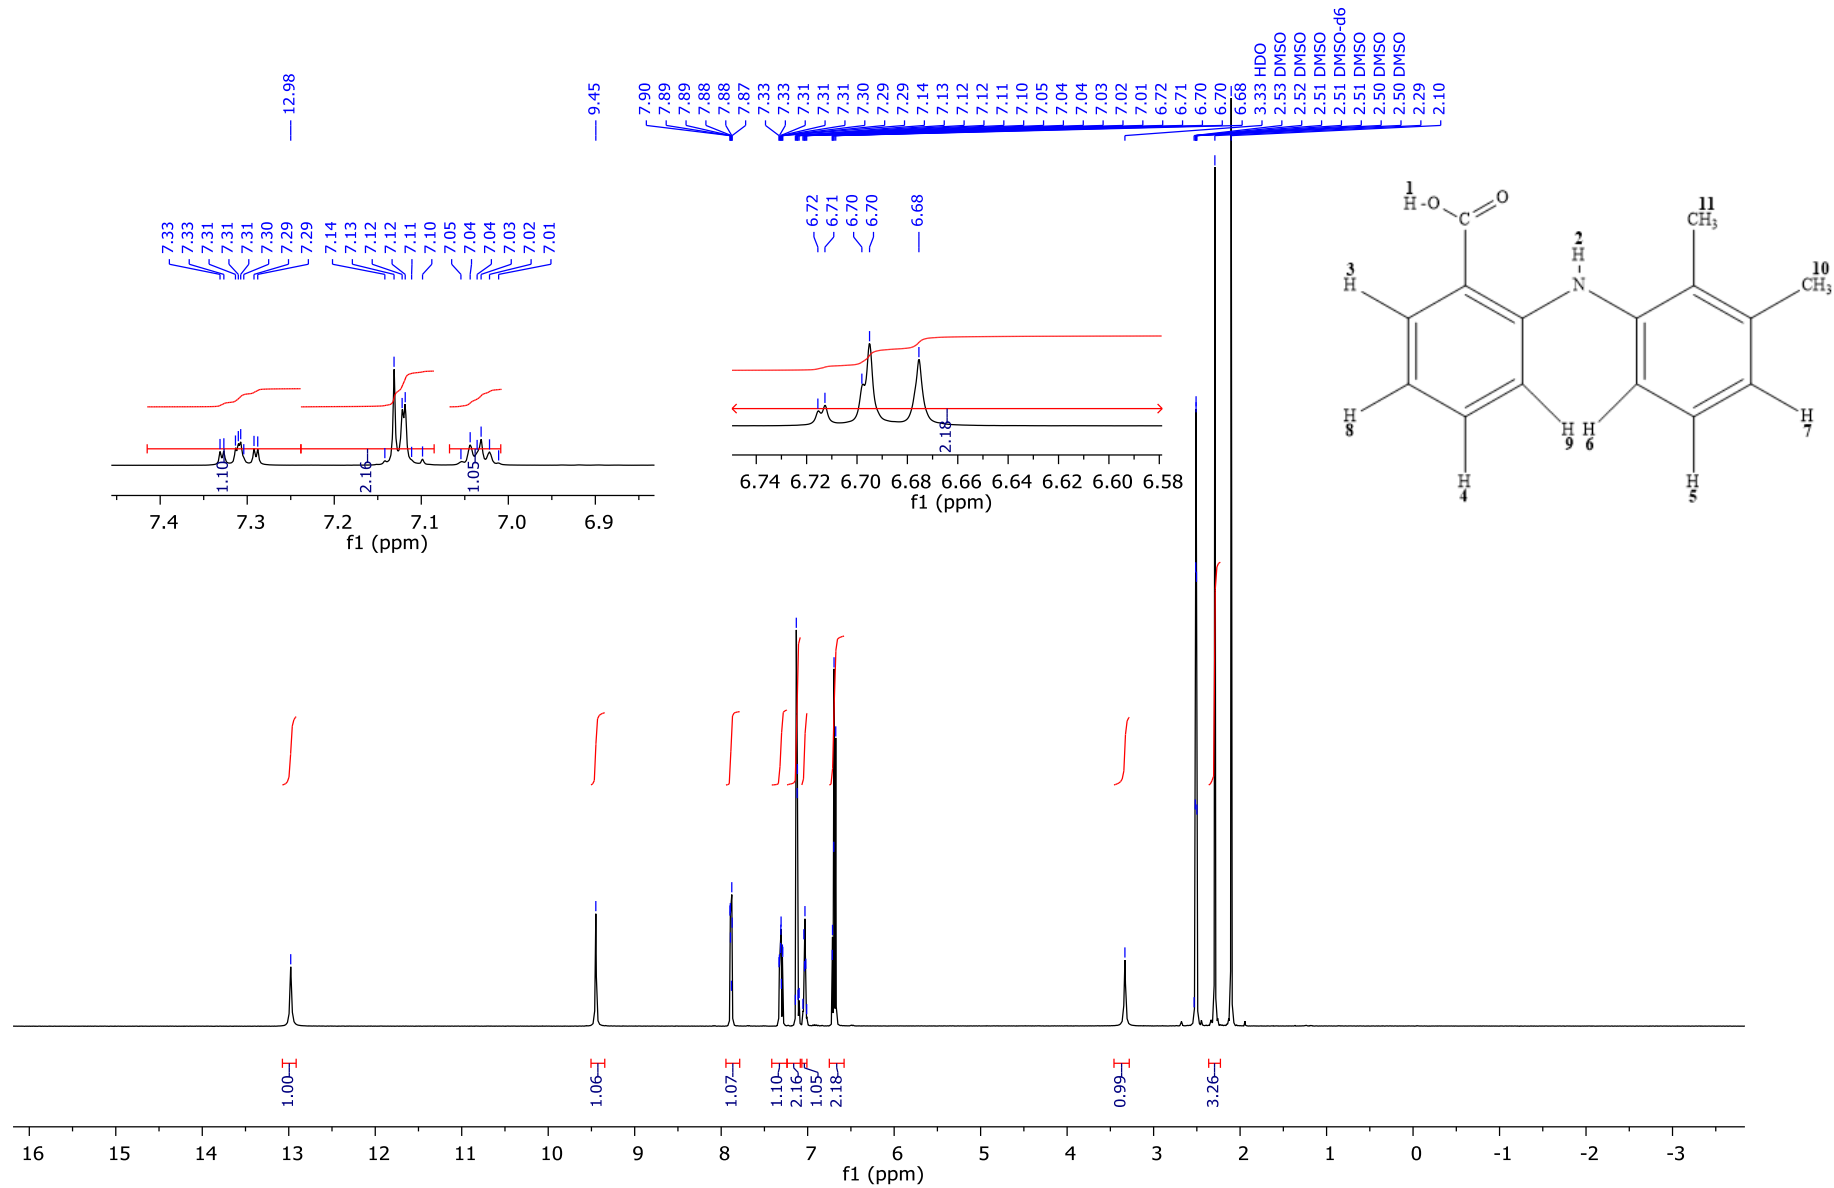

Figure S1. <sup>1</sup>H NMR Spectrum of MA.

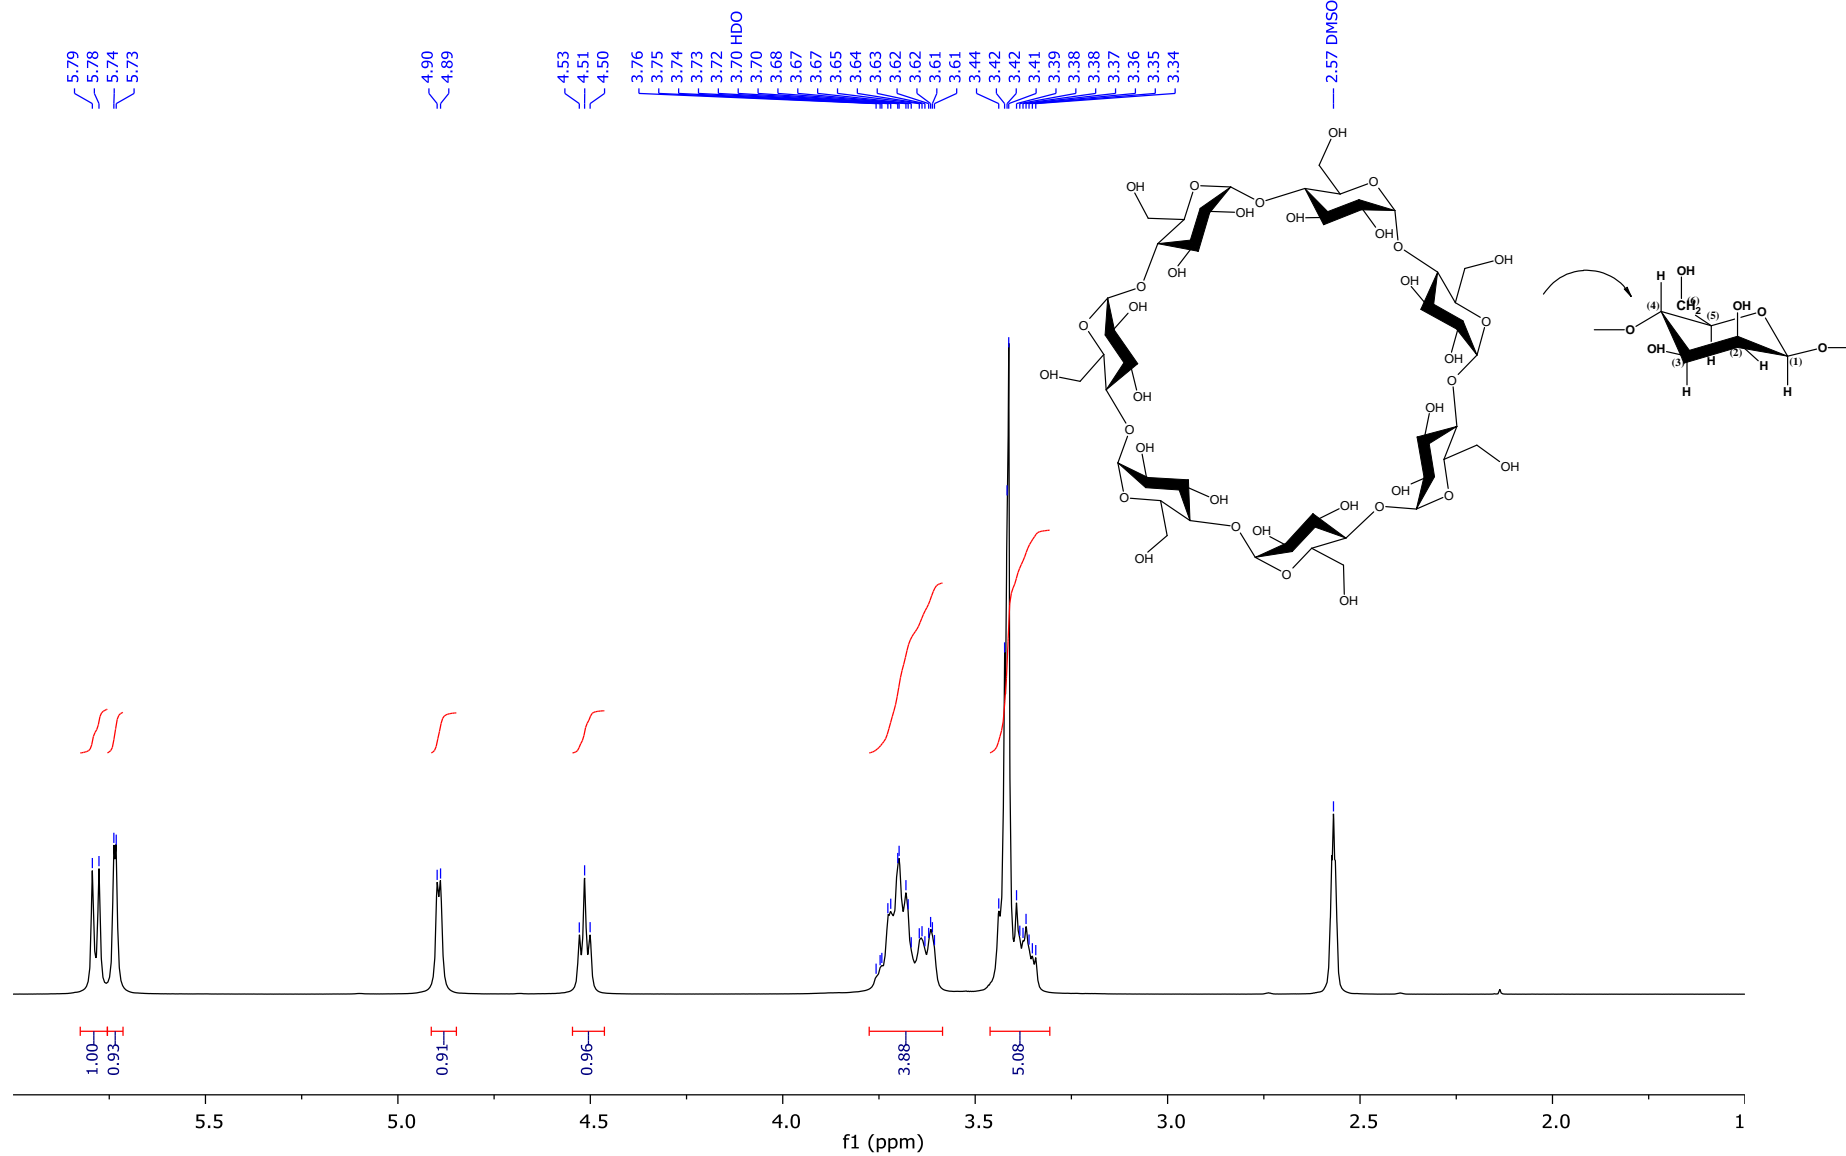

**Figure S2.** <sup>1</sup>H NMR Spectrum of β-CD.

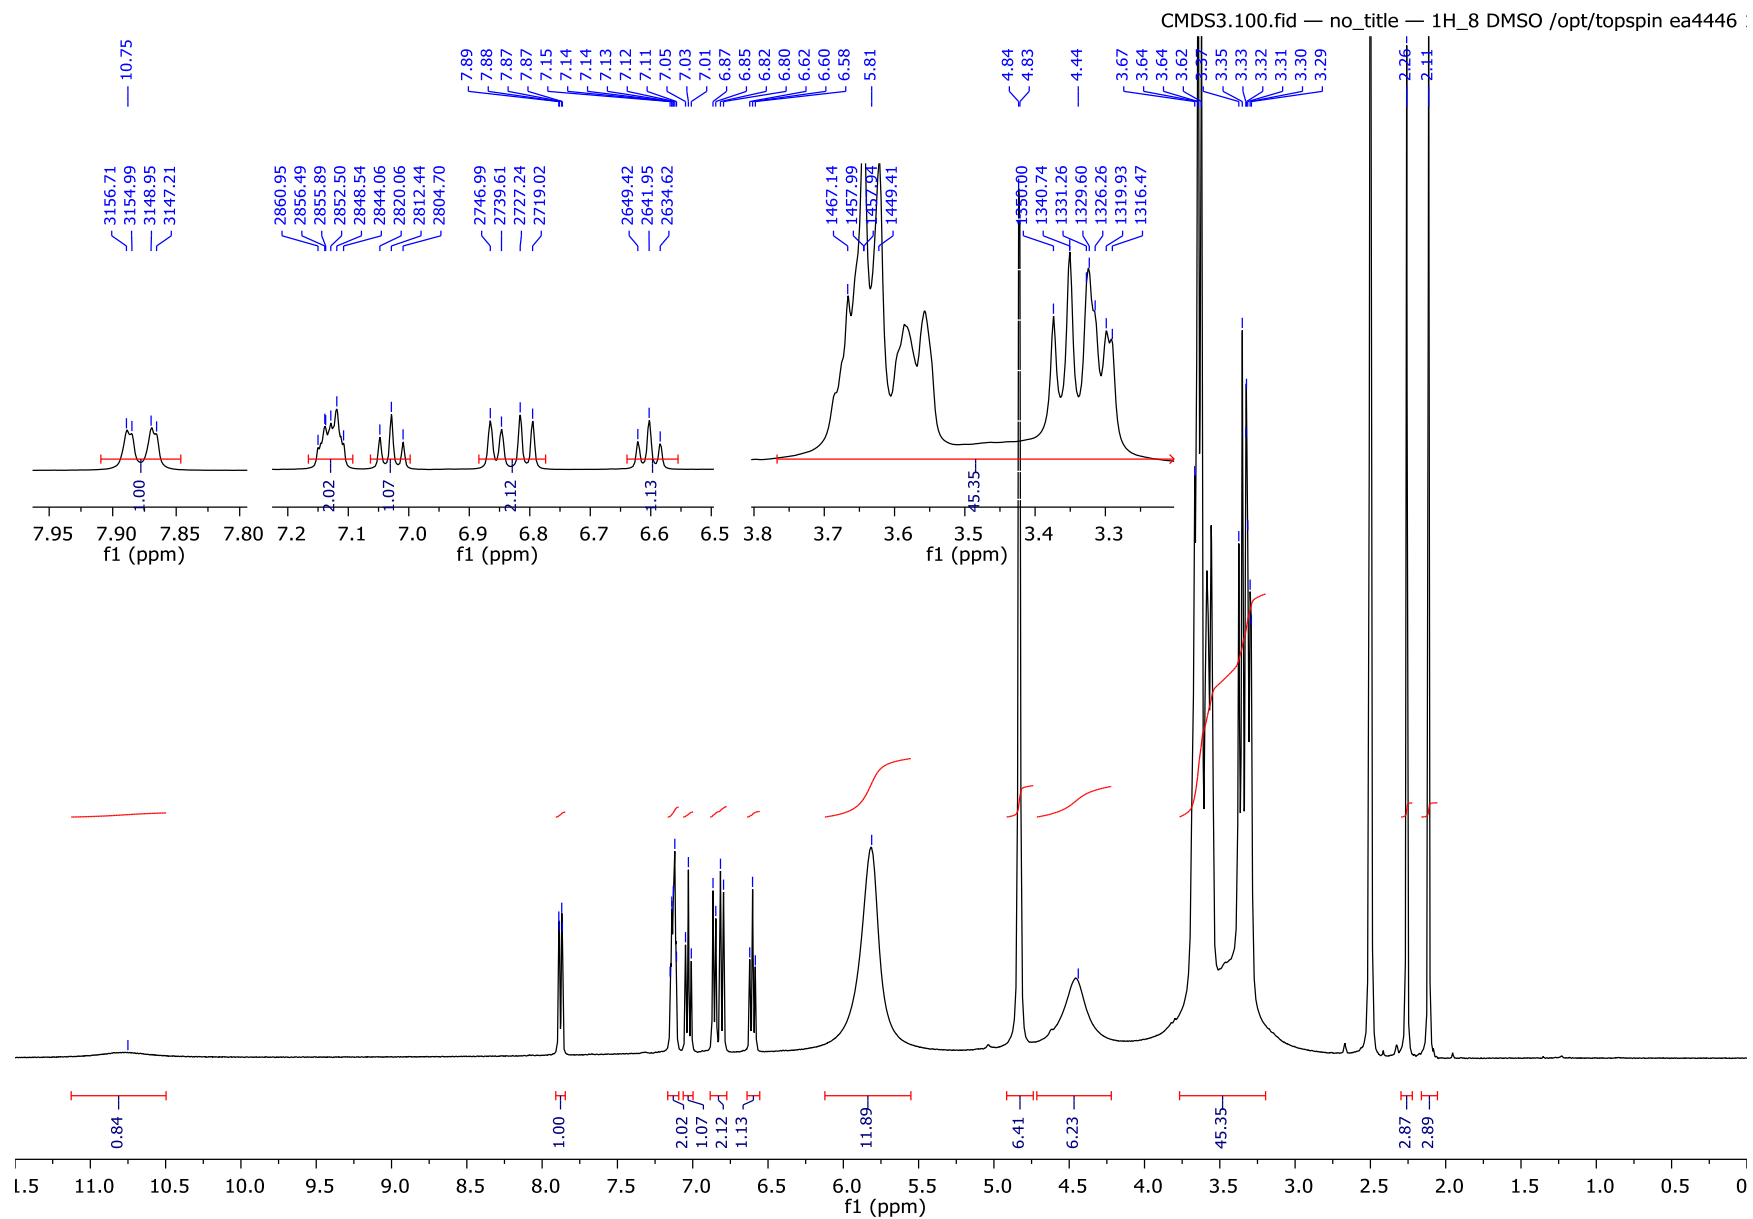

**Figure S3.**  $^1\text{H}$  NMR Spectrum of CE inclusion complex.

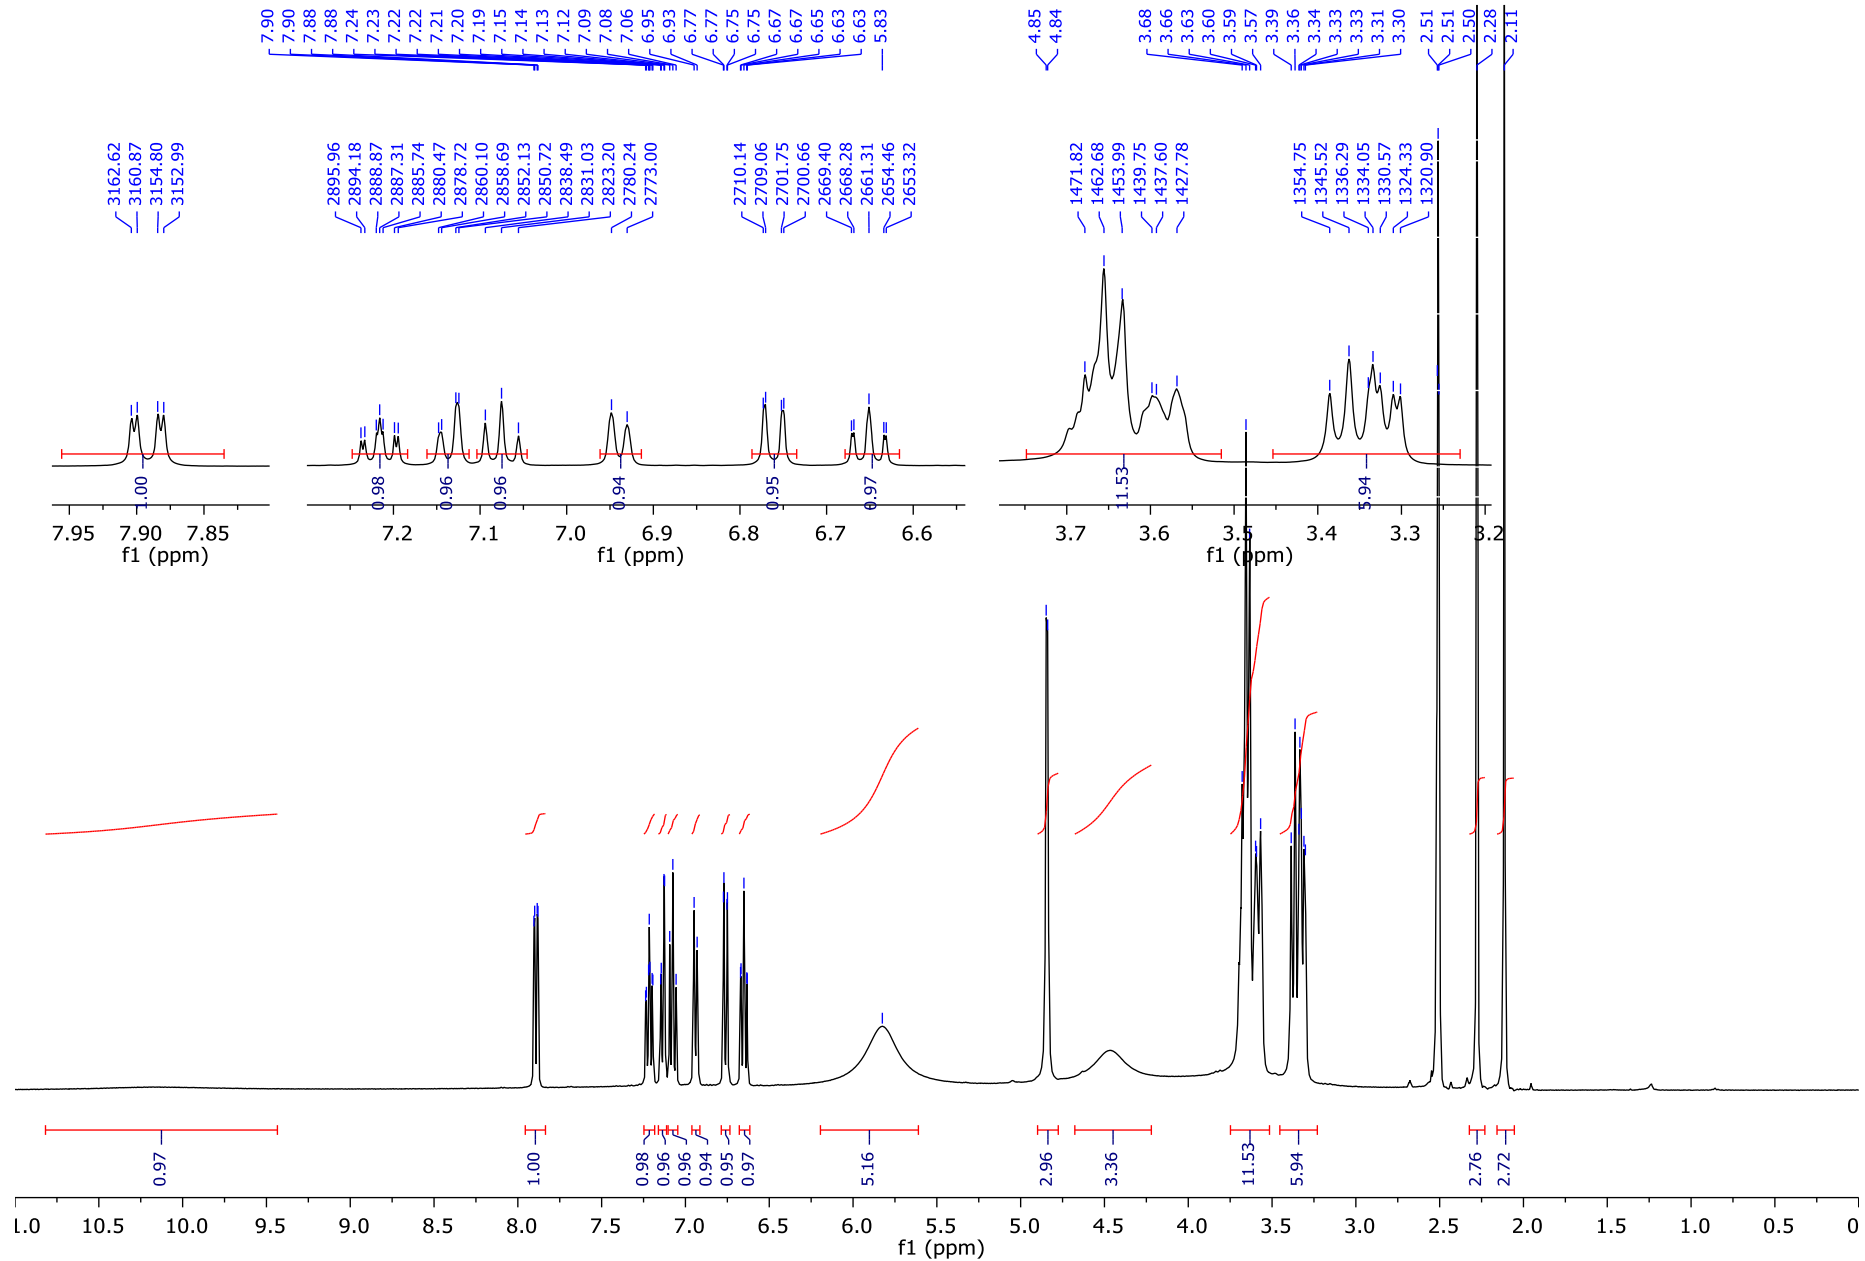

Figure S4. <sup>1</sup>H NMR Spectrum of KN inclusion complex.

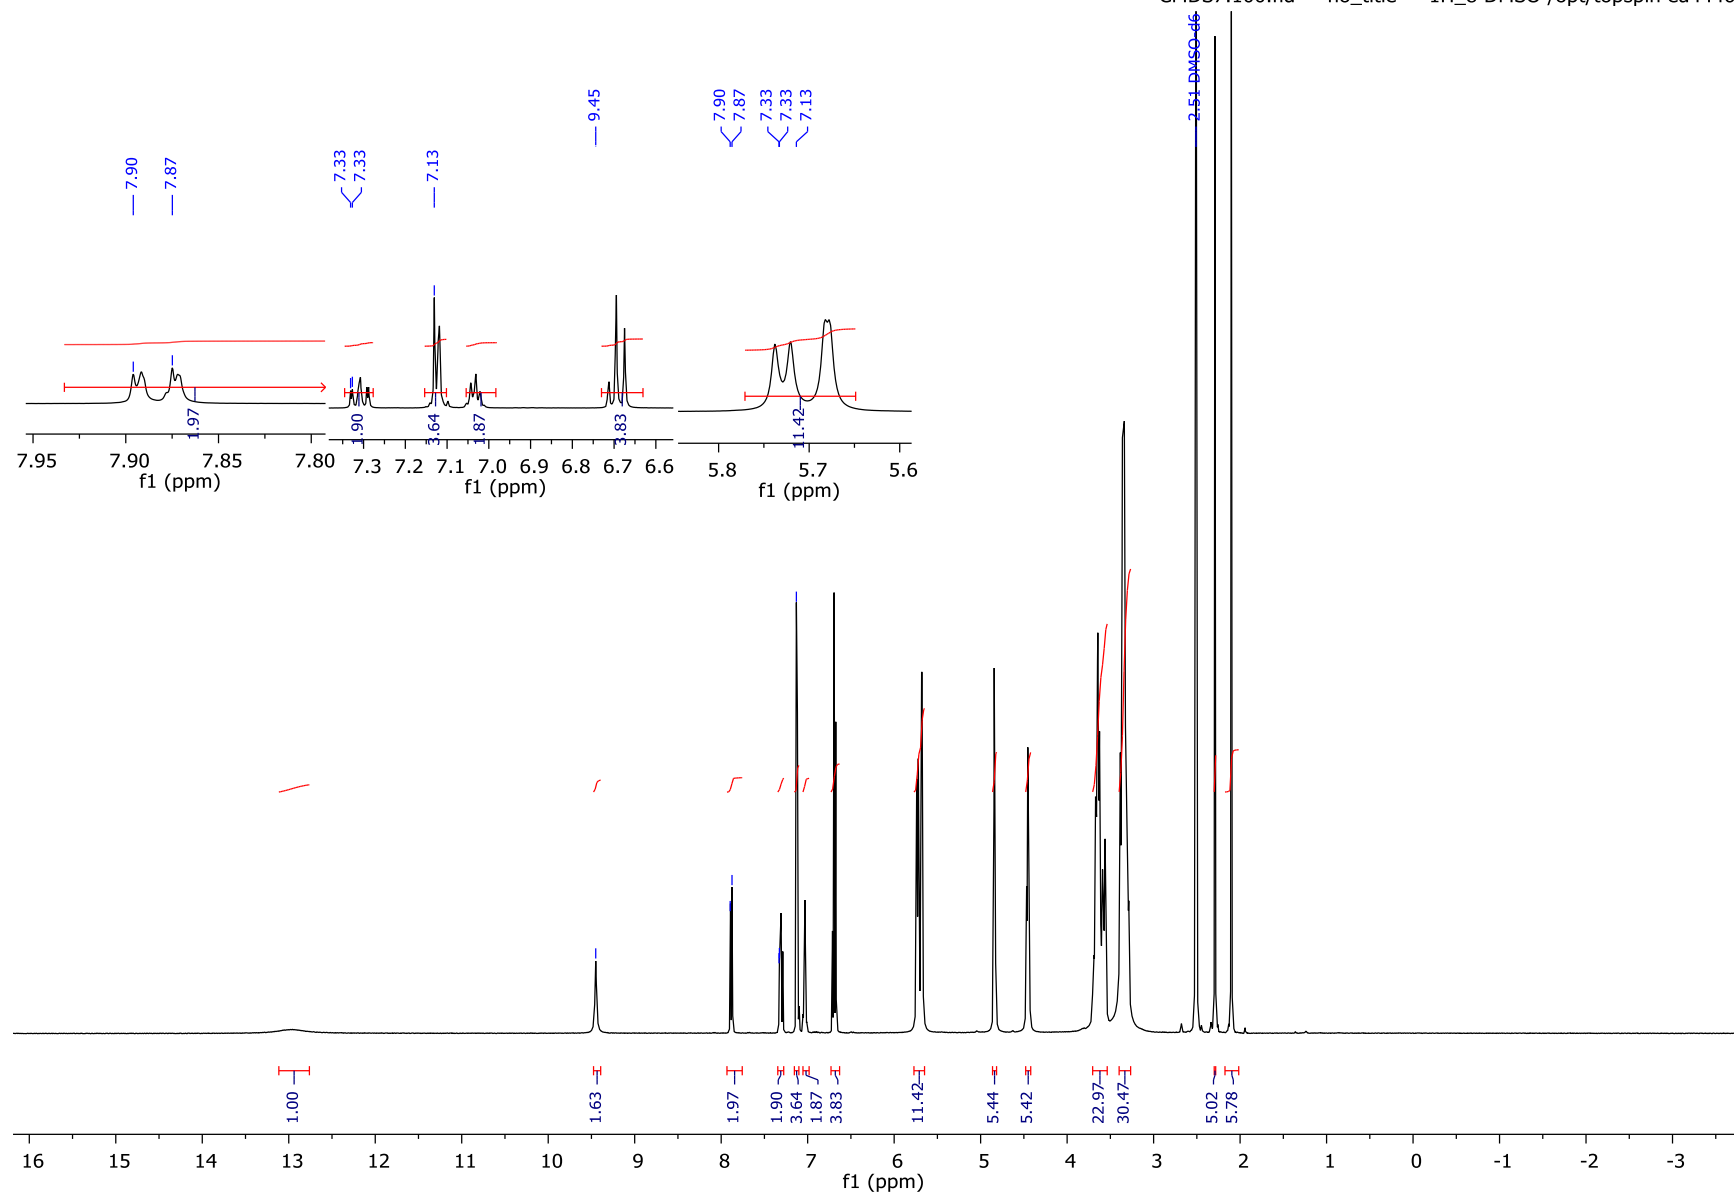

**Figure S5.** <sup>1</sup>H NMR Spectrum of PM inclusion complex.

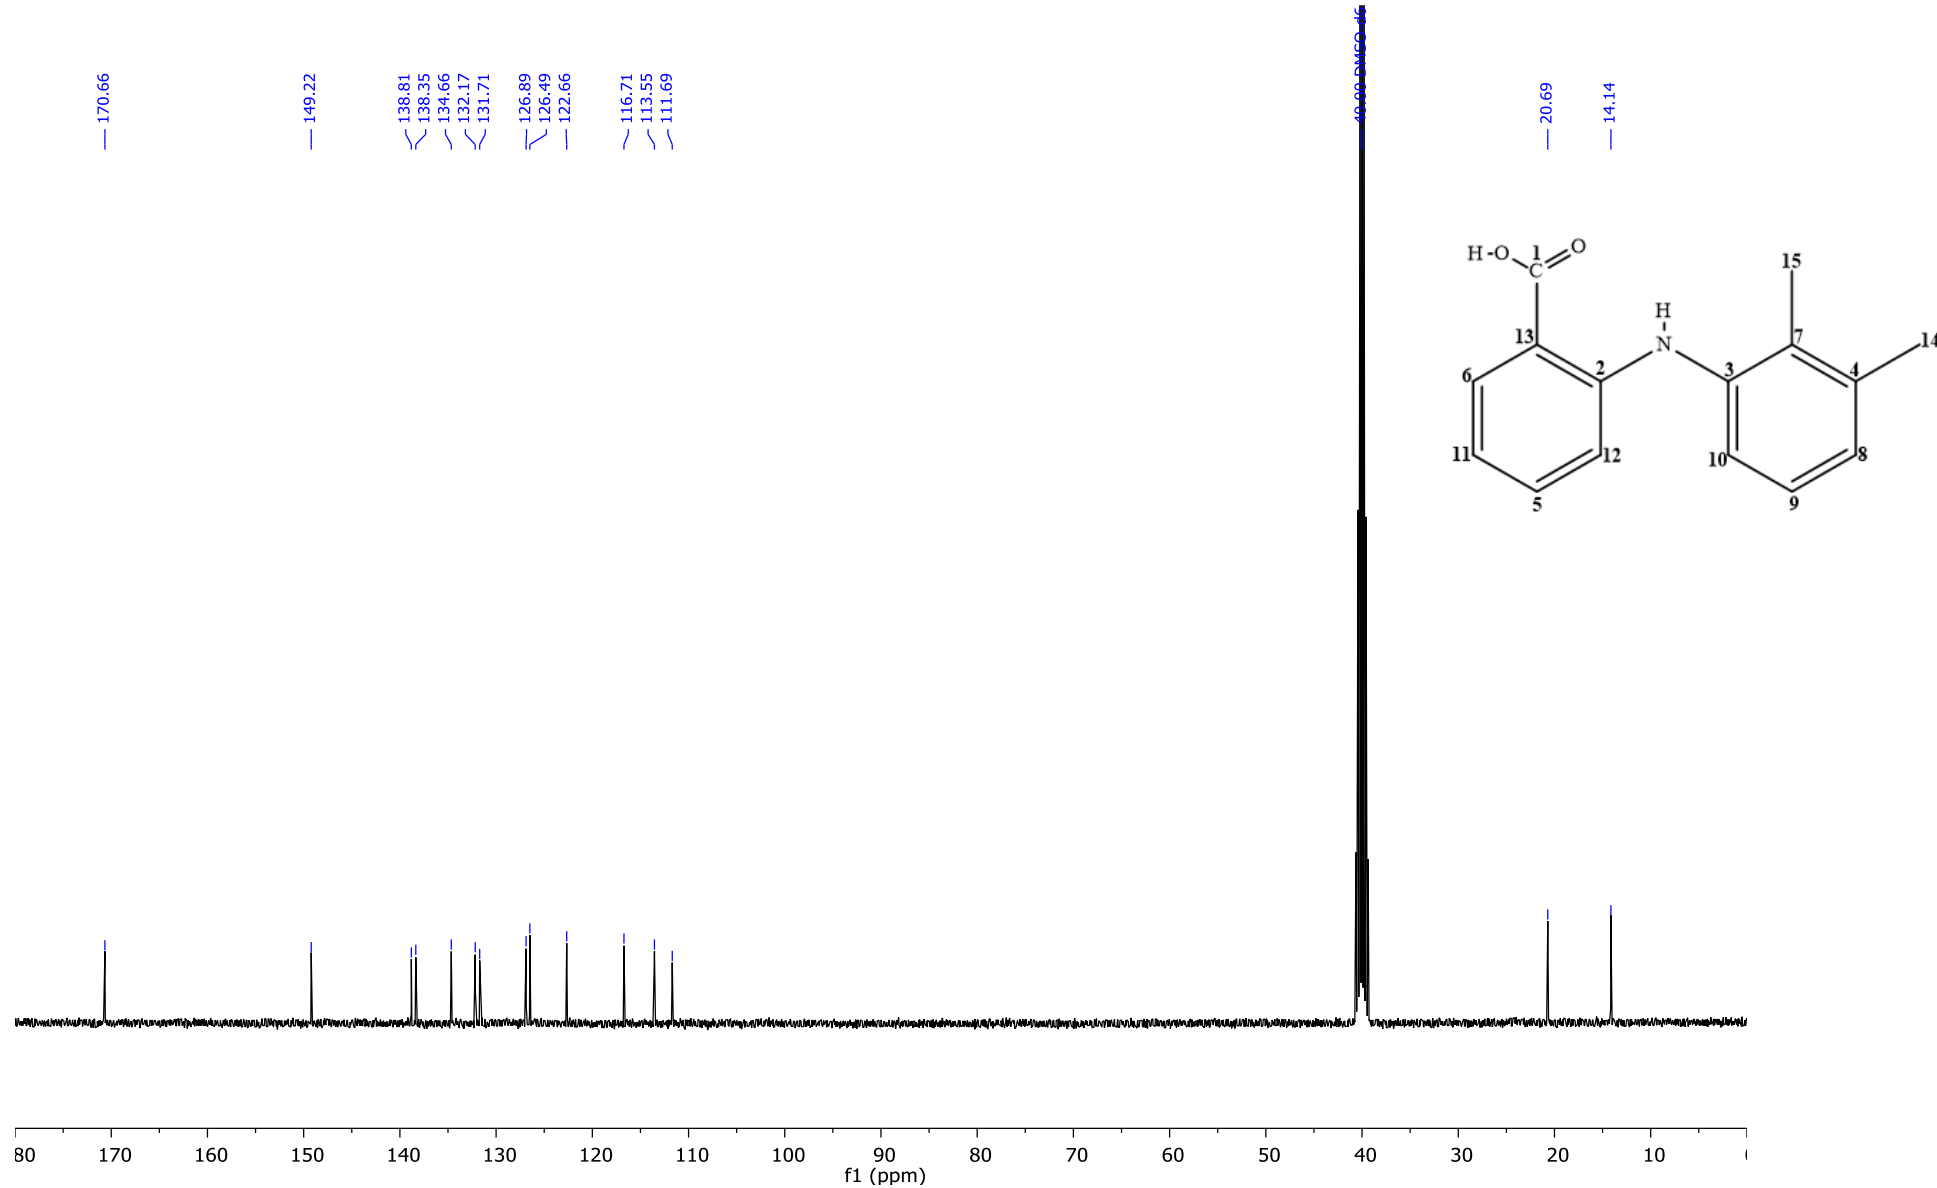

Figure S6. <sup>13</sup>C NMR Spectrum of MA.

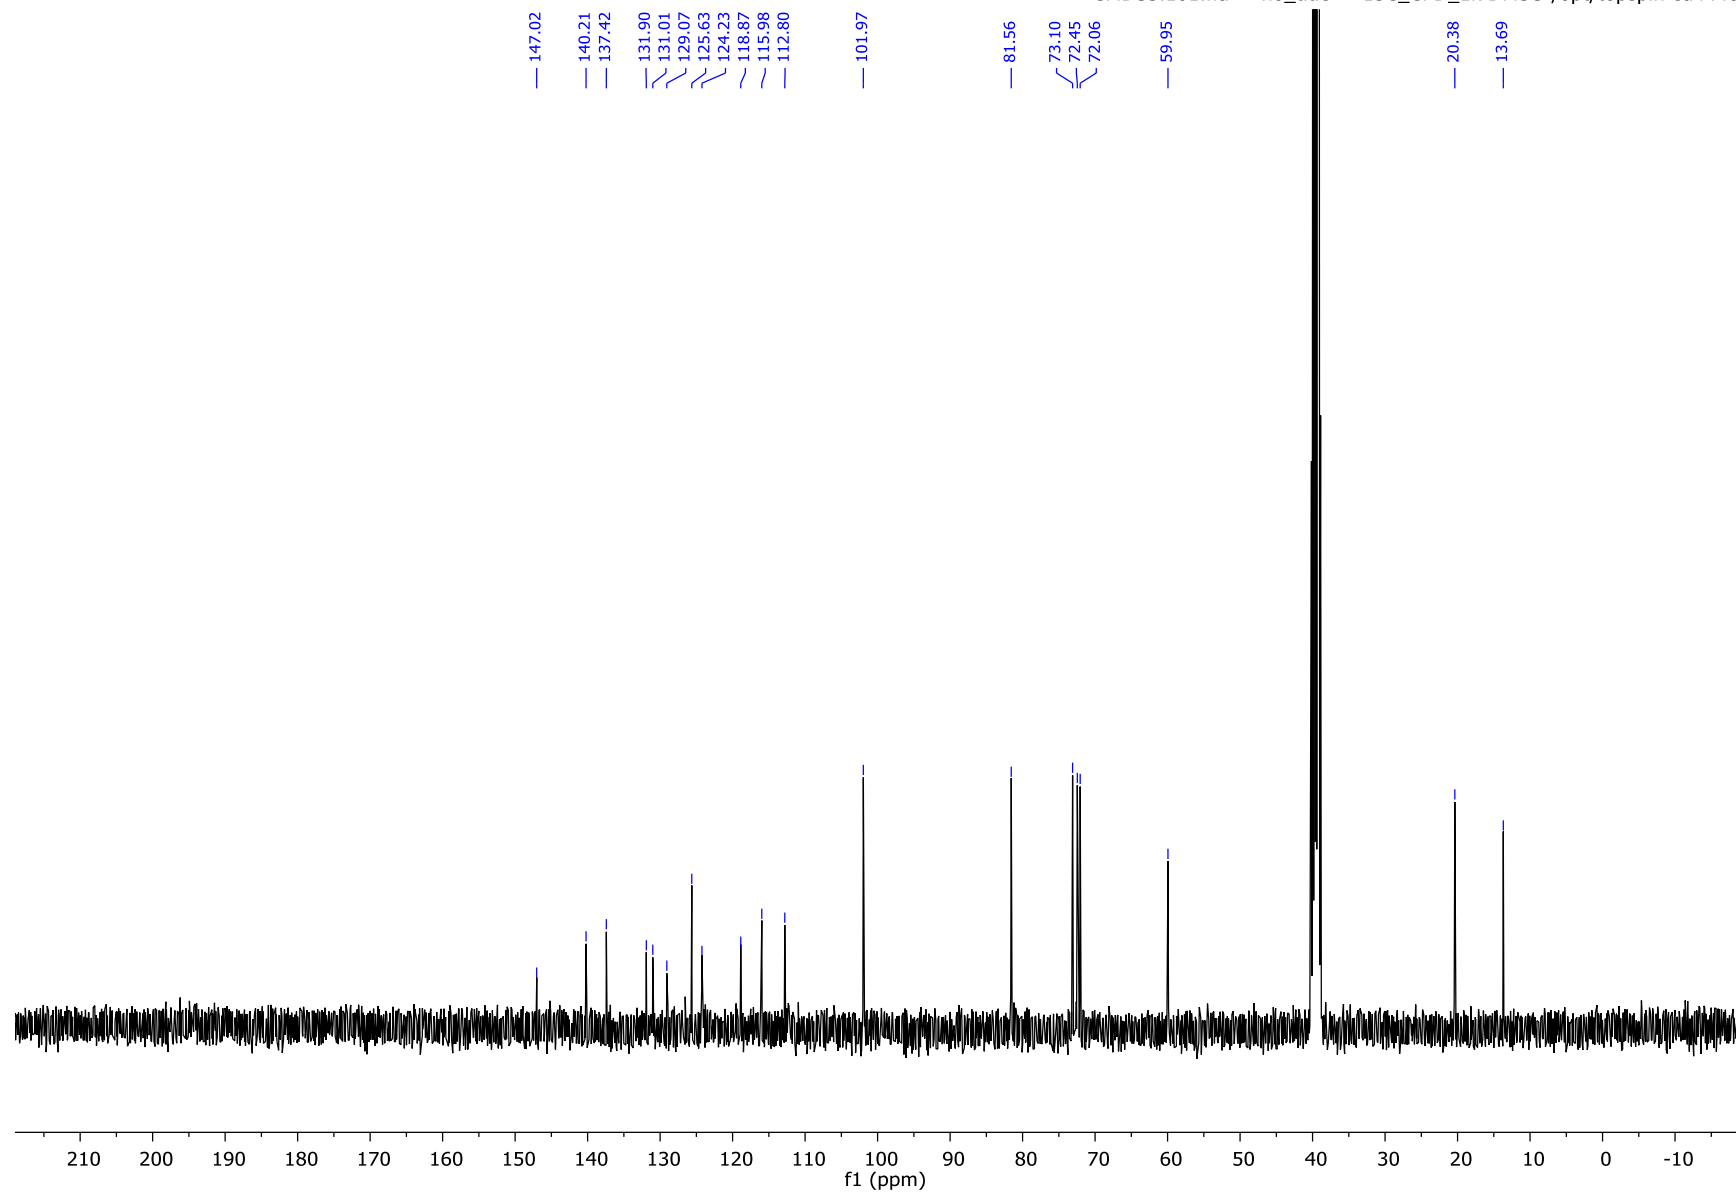

**Figure S7.** <sup>13</sup>C NMR Spectrum of CE inclusion complex.



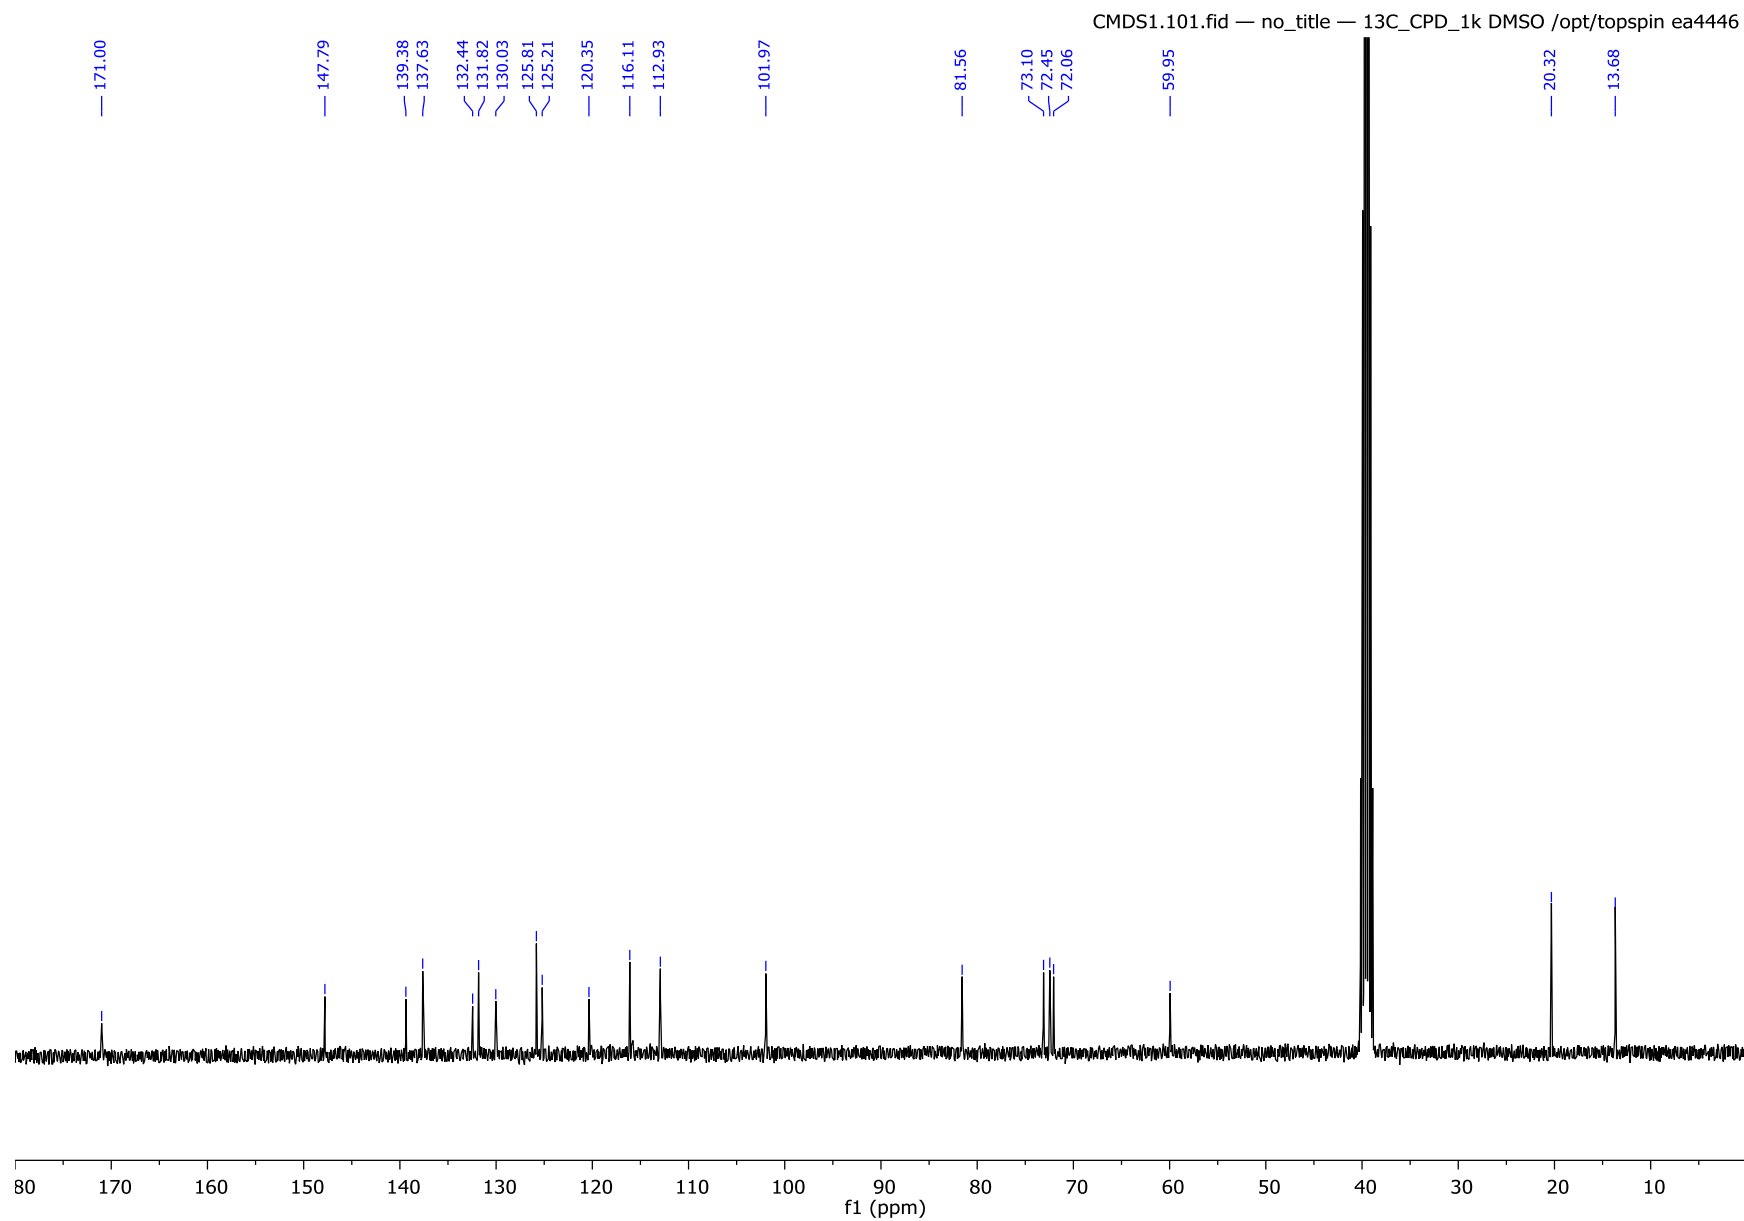

**Figure S8.**  $^{13}\text{C}$  NMR Spectrum of KN inclusion complex.

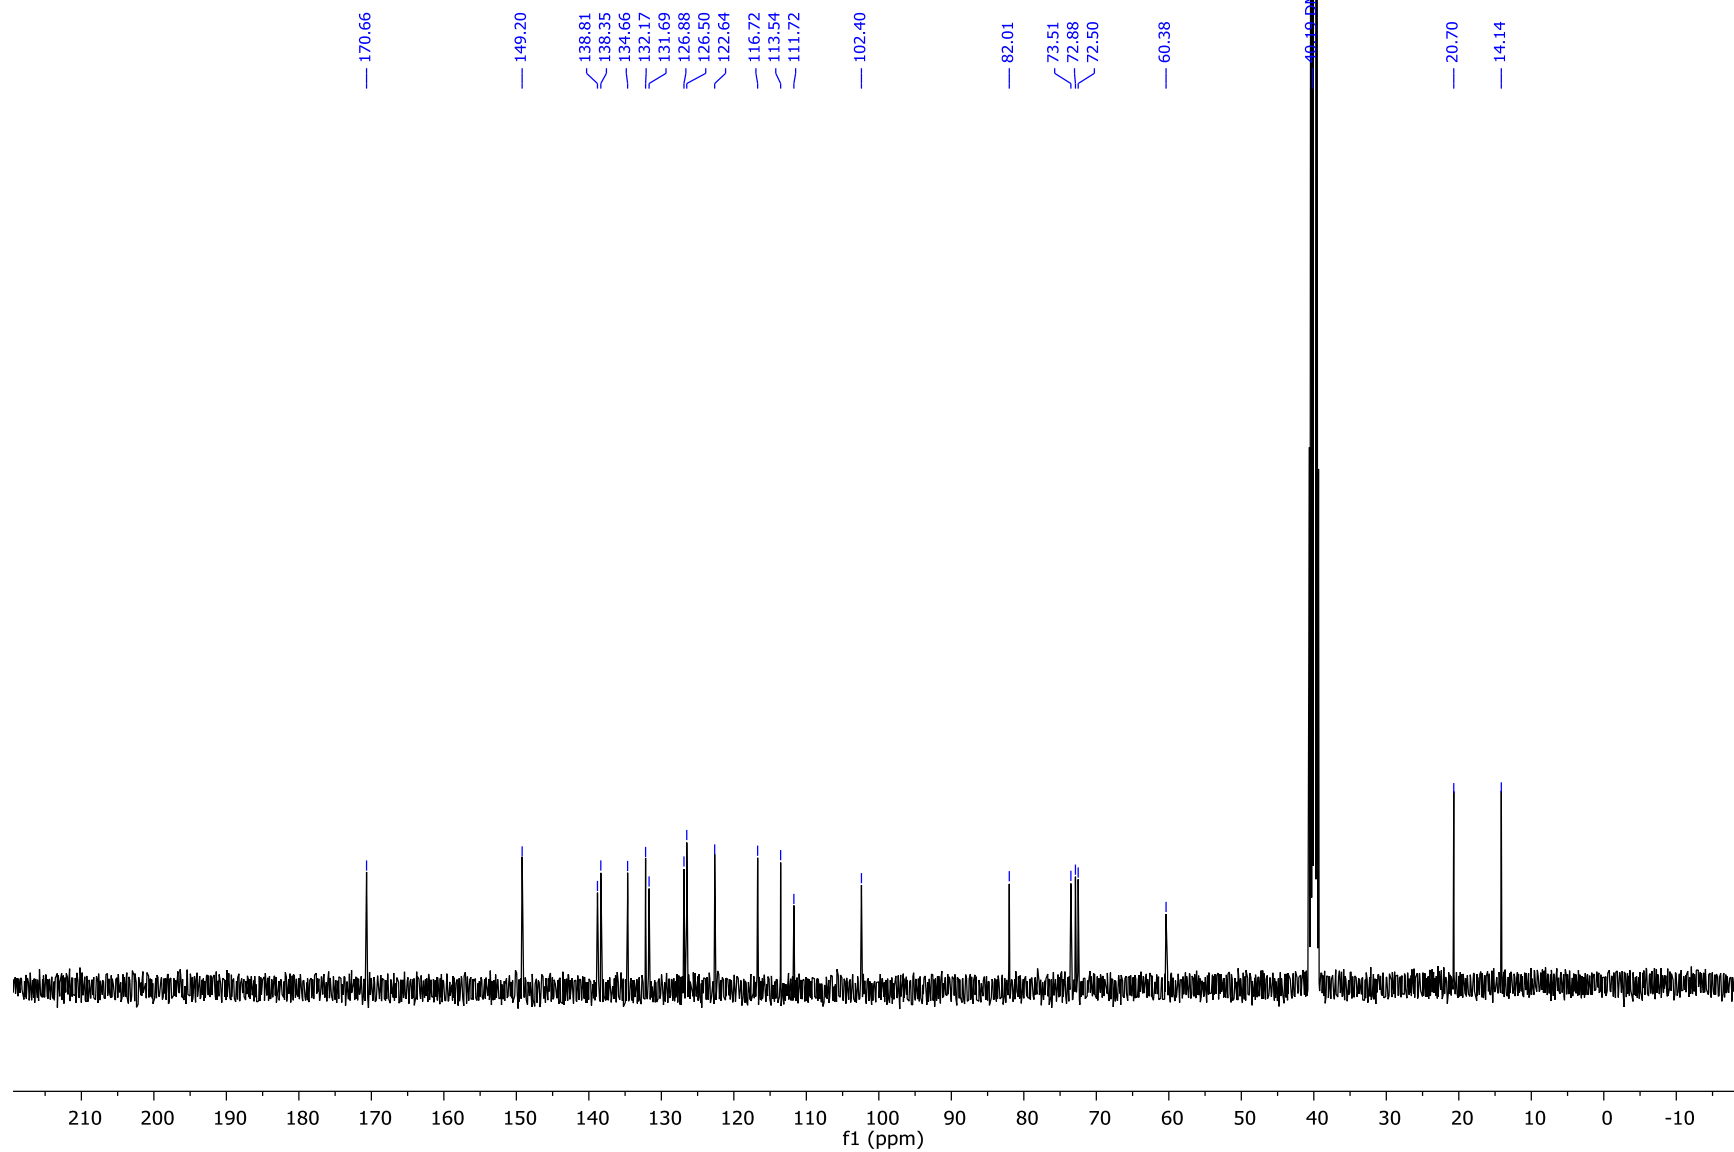

**Figure S9.**  $^{13}\text{C}$  NMR Spectrum of PM inclusion complex.

**Table S1.**  $^1\text{H}$  NMR Chemical shifts ( $\delta$ , ppm) for CH protons of  $\beta$ -CD alone ( $\delta_{\text{host}}$ ) and their complexation induced shifts ( $\text{CIS} = \delta_{\text{complex}} - \delta_{\text{host}}$ ) in  $\text{DMSO-}d_6$  at 25  $^\circ\text{C}$ .

| CH Protons of $\beta$ -CD | $\delta_{\text{host}}$ | CIS (CE) | CIS (KN) | CIS (PM) |
|---------------------------|------------------------|----------|----------|----------|
| <b>H-1</b>                | 4.89                   | -0.05    | -0.05    | -0.06    |
| <b>H-6</b>                | 3.76                   | -0.05    | -0.06    | -0.06    |
| <b>H-3</b>                | 3.70                   | -0.05    | -0.04    | -0.05    |
| <b>H-5</b>                | 3.64                   | -0.05    | -0.04    | -0.05    |
| <b>H-4</b>                | 3.42                   | -0.06    | -0.06    | -0.06    |
| <b>H-2</b>                | 3.37                   | -0.04    | -0.04    | -0.04    |
